# Supplementary material
Source: HighWire-hosted journal article supplement (https://bmjopenquality.bmj.com/highwire/filestream/145286/field_highwire_adjunct_files/0/bmjoq-2022-002025supp001_data_supplement.pdf)
Supplement: bmjoq-2022-002025supp001_data_supplement.pdf [file bmjoq-2022-002025supp001_data_supplement.pdf]

## Supporting Information: Original Questionnaire Main Survey

|                                               |               |                |
|-----------------------------------------------|---------------|----------------|
| EvaSys                                        | <b>MUSTER</b> | Electric Paper |
| Befragung zu Arbeitsbelastungen in der Pflege |               |                |
| Belastung in der Pflege 2020                  |               |                |

Bitte so markieren: ☐ ☒ ☐ ☐ Bitte verwenden Sie einen Kugelschreiber oder nicht zu starken Filzstift. Dieser Fragebogen wird maschinell erfasst.

Korrektur: ☐ ☒ ☐ ☐ Bitte beachten Sie im Interesse einer optimalen Datenerfassung die links gegebenen Hinweise beim Ausfüllen.

Sehr geehrte Mitarbeiter\*innen,

wir möchten mit diesem Fragebogen vorwiegend physisch belastende Tätigkeiten und Bereiche in der Pflege identifizieren. Die Ergebnisse sollen dazu beitragen, Maßnahmen treffen zu können, um die Situation der Pflegenden zu verbessern.

Insbesondere soll ein neues Patient\*innenbett eingeführt werden, das Pflegenden in der direkten Versorgung von Patient\*innen unterstützt. Daher zielt der Fragebogen vor allem auf diesen Arbeitsbereich und die damit zusammenhängenden Aufgaben und Arbeitsschritte ab.

Die Teilnahme an diesem Fragebogen ist freiwillig, und Ihre Daten werden dabei anonym erhoben, sodass es nicht möglich ist, die Antworten mit einzelnen Personen zu verbinden. Die Ergebnisse werden von der ausgewertet und weiterverarbeitet. Die Beantwortung des Fragebogens wird ca. 10 Minuten in Anspruch nehmen. Bitte beantworten Sie die Fragen ehrlich, da nur so dem Bedarf entsprechende Verbesserungen möglich sind.

Bei Fragen können Sie sich an \_\_\_\_\_ wenden.

Vielen Dank für Ihre Teilnahme!  
Pflegedirektorin

**1. Soziodemographische Daten**

|                                          |                                          |                                       |                                          |
|------------------------------------------|------------------------------------------|---------------------------------------|------------------------------------------|
| 1.1 Alter in Jahren                      | <input type="checkbox"/> bis 24          | <input type="checkbox"/> 25-34        | <input type="checkbox"/> 35-44           |
|                                          | <input type="checkbox"/> 45-54           | <input type="checkbox"/> 55 und älter |                                          |
| 1.2 Geschlecht                           | <input type="checkbox"/> weiblich        | <input type="checkbox"/> männlich     | <input type="checkbox"/> divers          |
|                                          | <input type="checkbox"/> keine Angabe    |                                       |                                          |
| 1.3 Welchem Bereich sind Sie zugeordnet? | <input type="checkbox"/> Allgemeinpflege | <input type="checkbox"/> IMC          | <input type="checkbox"/> Intensivstation |
|                                          | <input type="checkbox"/> Tagesklinik     |                                       |                                          |

**2. Bitte beantworten Sie folgende Fragen in Bezug auf Ihre Arbeit in der direkten Patient\*innenversorgung.**

|                                                                                             |                                                                                                                                                                                                                                                                                 |
|---------------------------------------------------------------------------------------------|---------------------------------------------------------------------------------------------------------------------------------------------------------------------------------------------------------------------------------------------------------------------------------|
| 2.1 Wie zufrieden sind Sie mit Ihrer Arbeit?                                                | unzufrieden <input type="checkbox"/> zufrieden |
| 2.2 Wie zufrieden sind Sie mit der Qualität der pflegerischen Versorgung auf Ihrer Station? | unzufrieden <input type="checkbox"/> zufrieden |

## MUSTER

EvaSys

Befragung zu Arbeitsbelastungen in der Pflege

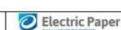

## 3. Einschätzung von pflegerischen Tätigkeiten

Wie schätzen Sie Ihre durchschnittliche **subjektive Belastung** durch folgende Tätigkeiten pro Schicht ein?

Subjektive Belastung beschreibt dabei das Ausmaß, in dem Sie sich durch diese Tätigkeit tatsächlich belastet fühlen.

|                                                                                 | niedrig                  | eher niedrig             | mittel                   | eher hoch                | hoch                     | nicht beantwortbar       |
|---------------------------------------------------------------------------------|--------------------------|--------------------------|--------------------------|--------------------------|--------------------------|--------------------------|
| 3.1 Körperpflege im Bett                                                        | <input type="checkbox"/> |
| 3.2 Verbandswechsel                                                             | <input type="checkbox"/> |
| 3.3 Positionswechsel im Bett                                                    | <input type="checkbox"/> |
| 3.4 Bewegungsfördernde Prophylaxen im Bett                                      | <input type="checkbox"/> |
| 3.5 Patient*innentransfer vom/aufs Bett                                         | <input type="checkbox"/> |
| 3.6 Betten neu beziehen                                                         | <input type="checkbox"/> |
| 3.7 Transport der Patient*innen im Bett                                         | <input type="checkbox"/> |
| 3.8 Pneumonieprophylaxe bei bettlägerigen Patient*innen                         | <input type="checkbox"/> |
| 3.9 Dekubitusprophylaxe                                                         | <input type="checkbox"/> |
| 3.10 Betreuung von Patient*innen mit Bettruhe bei Aufsteh- und Weglauftendenzen | <input type="checkbox"/> |
| 3.11 Wiegen der Patient*innen                                                   | <input type="checkbox"/> |
| 3.12 Korrektur der Körperhaltung im Bett                                        | <input type="checkbox"/> |
| 3.13 Kontrolle des Schlafes der Patient*innen                                   | <input type="checkbox"/> |
| 3.14 Kontrolle des Patient*innenzustands und Vitalparametererhebung             | <input type="checkbox"/> |
| 3.15 Dokumentation des Zustandes und der Vitalparameter                         | <input type="checkbox"/> |
| 3.16 Betreuung von Patient*innen bei Unregelmäßigkeiten der Vitalparameter      | <input type="checkbox"/> |

F15258U0P2PL0V0

22.04.2020, Seite 2/4

MUSTER

## MUSTER

EvaSys

Befragung zu Arbeitsbelastungen in der Pflege

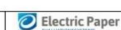

## 4. Einschätzung von pflegerischen Tätigkeiten

Wie schätzen Sie den durchschnittlichen **zeitlichen Aufwand** der folgenden Tätigkeiten pro Schicht ein?  
Nehmen Sie für Ihre Einschätzung als Vergleich den Aufwand in einer, **Ihrer Meinung nach, idealen Schicht** an.

|                                                                                 | niedrig                  | eher niedrig             | mittel                   | eher hoch                | hoch                     | nicht beantwortbar       |
|---------------------------------------------------------------------------------|--------------------------|--------------------------|--------------------------|--------------------------|--------------------------|--------------------------|
| 4.1 Körperpflege im Bett                                                        | <input type="checkbox"/> |
| 4.2 Verbandswechsel                                                             | <input type="checkbox"/> |
| 4.3 Positionswechsel im Bett                                                    | <input type="checkbox"/> |
| 4.4 Bewegungsfördernde Prophylaxen im Bett                                      | <input type="checkbox"/> |
| 4.5 Patient*innentransfer vom/aufs Bett                                         | <input type="checkbox"/> |
| 4.6 Betten neu beziehen                                                         | <input type="checkbox"/> |
| 4.7 Transport der Patient*innen im Bett                                         | <input type="checkbox"/> |
| 4.8 Pneumonieprophylaxe bei bettlägerigen Patient*innen                         | <input type="checkbox"/> |
| 4.9 Dekubitusprophylaxe                                                         | <input type="checkbox"/> |
| 4.10 Betreuung von Patient*innen mit Bettruhe bei Aufsteh- und Weglauftendenzen | <input type="checkbox"/> |
| 4.11 Wiegen der Patient*innen                                                   | <input type="checkbox"/> |
| 4.12 Korrektur der Körperhaltung im Bett                                        | <input type="checkbox"/> |
| 4.13 Kontrolle des Schlafes der Patient*innen                                   | <input type="checkbox"/> |
| 4.14 Kontrolle des Patient*innenzustands und Vitalparametererhebung             | <input type="checkbox"/> |
| 4.15 Dokumentation des Zustandes und der Vitalparameter                         | <input type="checkbox"/> |
| 4.16 Betreuung von Patient*innen bei Unregelmäßigkeiten der Vitalparameter      | <input type="checkbox"/> |

5. Bitte geben Sie für jede der folgenden Aussagen an, inwieweit diese in der direkte Patient\*innenversorgung auf Sie zutreffen. Wie häufig...

|                                                         | nie/fast nie             | selten                   | manchmal                 | oft                      | immer                    |
|---------------------------------------------------------|--------------------------|--------------------------|--------------------------|--------------------------|--------------------------|
| 5.1 ... fühlen Sie sich müde?                           | <input type="checkbox"/> |
| 5.2 ... sind Sie körperlich erschöpft?                  | <input type="checkbox"/> |
| 5.3 ... sind Sie emotional erschöpft?                   | <input type="checkbox"/> |
| 5.4 ... denken Sie: "Ich kann nicht mehr"?              | <input type="checkbox"/> |
| 5.5 ... fühlen Sie sich ausgelaugt?                     | <input type="checkbox"/> |
| 5.6 ... fühlen Sie sich schwach und krankheitsanfällig? | <input type="checkbox"/> |

F15258U0P3PL0V0

22.04.2020, Seite 3/4

MUSTER

## MUSTER

EvaSys

Befragung zu Arbeitsbelastungen in der Pflege

Electric Paper

6. Die folgenden Fragen beschäftigen sich mit Ihren Gedanken und Gefühlen während der direkten Versorgung der Patient\*innen im letzten Monat.

|                                                                                                                                        | nie/fast nie             | selten                   | manchmal                 | oft                      | immer                    |
|----------------------------------------------------------------------------------------------------------------------------------------|--------------------------|--------------------------|--------------------------|--------------------------|--------------------------|
| 6.1 Wie oft wurden Sie im letzten Monat von unerwarteten Ereignissen überrascht?                                                       | <input type="checkbox"/> |
| 6.2 Wie oft hatten Sie im letzten Monat das Gefühl, dass es Ihnen nicht möglich ist, wichtige Dinge bei Ihrer Arbeit zu kontrollieren? | <input type="checkbox"/> |
| 6.3 Wie oft haben Sie sich im letzten Monat nervös oder "gestresst" gefühlt?                                                           | <input type="checkbox"/> |
| 6.4 Wie oft haben Sie sich im letzten Monat zuversichtlich gefühlt, dass Sie in der Lage sind Probleme bei der Arbeit zu regeln?       | <input type="checkbox"/> |
| 6.5 Wie oft hatten Sie im letzten Monat das Gefühl, dass die Dinge bei Ihrer Arbeit genauso laufen, wie sie sollten?                   | <input type="checkbox"/> |
| 6.6 Wie oft hatten Sie im letzten Monat das Gefühl, dass Sie die anfallenden Aufgaben nicht bewältigen können?                         | <input type="checkbox"/> |
| 6.7 Wie oft waren Sie in der Lage, mit Widrigkeiten kontrolliert umgehen zu können?                                                    | <input type="checkbox"/> |
| 6.8 Wie oft hatten Sie das Gefühl, alles im Griff zu haben?                                                                            | <input type="checkbox"/> |
| 6.9 Wie oft haben Sie sich über Dinge geärgert, die außerhalb Ihrer Kontrolle lagen?                                                   | <input type="checkbox"/> |
| 6.10 Wie oft hatten Sie das Gefühl, dass sich die Schwierigkeiten so sehr aufsummieren, dass sie Ihnen über den Kopf wachsen?          | <input type="checkbox"/> |

7. Bitte beantworten Sie noch folgende allgemeine Fragen.

7.1 Wenn Sie den besten denkbaren Gesundheitszustand mit 10 Punkten bewerten und den schlechtesten denkbaren mit 1 Punkten: Wie viele Punkte vergeben Sie dann für Ihren derzeitigen Gesundheitszustand? 1 ☐ ☐ ☐ ☐ ☐ ☐ ☐ ☐ ☐ ☐ 10

7.2 Wie schätzen Sie den Einsatz ein, um die Arbeitsbelastung in der Pflege zu reduzieren? sehr niedrig ☐ ☐ ☐ ☐ ☐ ☐ ☐ ☐ ☐ ☐ sehr hoch

8. Anmerkungen, Ergänzungen, Kommentare:

8.1

F15258U0P4PLOV0

22.04.2020, Seite 4/4

MUSTER

Supporting Information: Translated Questionnaire Main Survey

Title: Survey on workload of nurses

Dear employees,

we would like to use this questionnaire to identify predominantly physically stressful activities and areas in nursing. The results should help us to take measures to improve the situation of nurses.

In particular, we want to introduce a new patient bed that supports nurses in the direct care of patients. Therefore, the questionnaire is mainly aimed at this work area and the related tasks and work steps.

Participation in this questionnaire is voluntary and your data will be collected anonymously, so it is not possible to link the answers to individual persons. The results will be evaluated and processed by [name of the hospital]. Answering the questionnaire will take approximately 10 minutes. Please answer the questions honestly, as this is the only way to make improvements according to the needs.

If you have any questions, please contact [Name and E-mail address of responsible person].

Thank you very much for your participation!

Yours, [Name], Nursing Director

| Number | Question                   | Answer                                                            |
|--------|----------------------------|-------------------------------------------------------------------|
| 1.     | Sociodemographic Data      |                                                                   |
| 1.1    | Age in Years               | Younger than 24<br>24-34<br>35-44<br>45-54<br>55 or older         |
| 1.2    | Gender                     | Male<br>Female<br>Divers<br>No answer                             |
| 1.3    | Which area do you work in? | General care<br>Intermediate Care<br>Intensive Care<br>Day Clinic |

|      |                                                                                                          |                                    |
|------|----------------------------------------------------------------------------------------------------------|------------------------------------|
| 2.   | Please answer the following questions related to your work in direct patient care.                       |                                    |
| 2.1  | How satisfied are you with your work?                                                                    | 10-point rating scale              |
| 2.2  | How satisfied are you with the quality of nursing care on your ward?                                     | 1 = dissatisfied<br>10 = satisfied |
| 3.   | Assessment of nursing tasks                                                                              |                                    |
|      | How would you rate your average <b>subjective workload</b> caused by the following activities per shift? |                                    |
|      | Subjective workload describes the extent to which you actually feel strained by this activity.           |                                    |
| 3.1  | Personal hygiene in bed                                                                                  | 5-point Likert scale               |
| 3.2  | Change bandages                                                                                          | 1 = low                            |
| 3.3  | Change position in bed                                                                                   | 2 = rather low                     |
| 3.4  | Movement-promoting prophylaxis in bed                                                                    | 3 = medium                         |
| 3.5  | Patient transfer from/to bed                                                                             | 4 = rather high                    |
| 3.6  | Making beds                                                                                              | 5 = high                           |
| 3.7  | Transporting patients in bed                                                                             | NA = cannot be answered            |
| 3.8  | Pneumonia prophylaxis for bedridden patients                                                             |                                    |
| 3.9  | Decubitus prophylaxis                                                                                    |                                    |
| 3.10 | Care of patients with bed rest with tendencies to get up and tendencies to run away                      |                                    |
| 3.11 | Weighing patients                                                                                        |                                    |
| 3.12 | Correction of posture in bed                                                                             |                                    |
| 3.13 | Checking the sleep of the patients                                                                       |                                    |
| 3.14 | Control of the patient's condition and vital signs                                                       |                                    |
| 3.15 | Documentation of the patient's condition and vital signs                                                 |                                    |
| 3.16 | Care of patients in case of irregularities of vital signs                                                |                                    |
| 4.   | Assessment of nursing tasks                                                                              |                                    |
|      | How would you estimate the <b>average time required</b> for the following activities per shift?          |                                    |
|      | For your estimation, use as a comparison the time required in what you consider to be an ideal shift.    |                                    |
| 4.1  | Personal hygiene in bed                                                                                  | 5-point Likert scale               |
| 4.2  | Change bandages                                                                                          | 1 = low                            |
| 4.3  | Change position in bed                                                                                   | 2 = rather low                     |
| 4.4  | Movement-promoting prophylaxis in bed                                                                    | 3 = medium                         |
| 4.5  | Patient transfer from/to bed                                                                             | 4 = rather high                    |
| 4.6  | Making beds                                                                                              | 5 = high                           |
| 4.7  | Transporting patients in bed                                                                             | NA = cannot be answered            |
| 4.8  | Pneumonia prophylaxis for bedridden patients                                                             |                                    |
| 4.9  | Decubitus prophylaxis                                                                                    |                                    |
| 4.10 | Care of patients with bed rest with tendencies to get up and tendencies to run away                      |                                    |

|      |                                                                                                                                                                                 |                                                |
|------|---------------------------------------------------------------------------------------------------------------------------------------------------------------------------------|------------------------------------------------|
| 4.11 | Weighing patients                                                                                                                                                               |                                                |
| 4.12 | Correction of posture in bed                                                                                                                                                    |                                                |
| 4.13 | Checking the sleep of the patients                                                                                                                                              |                                                |
| 4.14 | Control of the patient's condition and vital signs                                                                                                                              |                                                |
| 4.15 | Documentation of the patient's condition and vital signs                                                                                                                        |                                                |
| 4.16 | Care of patients in case of irregularities of vital signs                                                                                                                       |                                                |
| 5.   | For each of the following statements, please indicate the extent to which they apply to you in direct patient care.<br>How often...                                             |                                                |
| 5.1  | ... do you feel tired?                                                                                                                                                          | 5-point Likert scale                           |
| 5.2  | ... are you physically exhausted?                                                                                                                                               | 1 = almost never/never                         |
| 5.3  | ... are you emotionally exhausted?                                                                                                                                              | 2 = rarely                                     |
| 5.4  | ... do you think: "I can't go on"?                                                                                                                                              | 3 = sometimes                                  |
| 5.5  | ... do you feel exhausted?                                                                                                                                                      | 4 = often                                      |
| 5.6  | ... do you feel weak and prone to illness?                                                                                                                                      | 5 = always                                     |
| 6.   | The following questions address your thoughts and feelings while providing direct patient care in the last month.                                                               |                                                |
| 6.1  | In the last month, how often were you surprised by unexpected events?                                                                                                           | 5-point Likert scale<br>1 = almost never/never |
| 6.2  | In the last month, how often did you feel that it was not possible for you to control important things at your work?                                                            | 2 = rarely<br>3 = sometimes                    |
| 6.3  | In the last month, how often have you felt nervous or "stressed"?                                                                                                               | 4 = often<br>5 = always                        |
| 6.4  | In the last month, how often have you felt confident that you are able to handle problems at work?                                                                              |                                                |
| 6.5  | In the last month, how often did you feel that things were going exactly as they should at work?                                                                                |                                                |
| 6.6  | In the last month, how often did you feel that you were unable to handle the tasks at hand?                                                                                     |                                                |
| 6.7  | How often were you able to handle adversity in a controlled manner?                                                                                                             |                                                |
| 6.8  | How often did you feel like you had everything under control?                                                                                                                   |                                                |
| 6.9  | How often did you feel angry about things that were out of your control?                                                                                                        |                                                |
| 6.10 | How often did you feel like difficulties were piling up so much that they were getting on top of you?                                                                           |                                                |
| 7.   | Please answer the following general questions.                                                                                                                                  |                                                |
|      | If you give the best conceivable state of health 10 points and the worst conceivable state of health 1 point: How many points do you then assign to your current health status? | 10-point rating scale                          |



|     |                                                                                   |                                                         |
|-----|-----------------------------------------------------------------------------------|---------------------------------------------------------|
|     | How do you rate [name of the hospital] efforts to reduce the workload in nursing? | 10-point rating scale<br>1 = very low<br>10 = very high |
| 8.  | Notes, additions, comments:                                                       |                                                         |
| 8.1 | Free text field                                                                   |                                                         |
